# Supplementary material
Source: PubMed Central journal article supplement (PMC7112158)
Supplement: NIHMS1556280-supplement-1.pdf [file NIHMS1556280-supplement-1.pdf]

## Supplemental Figures

## Supplemental Figure 1. Study enrollment

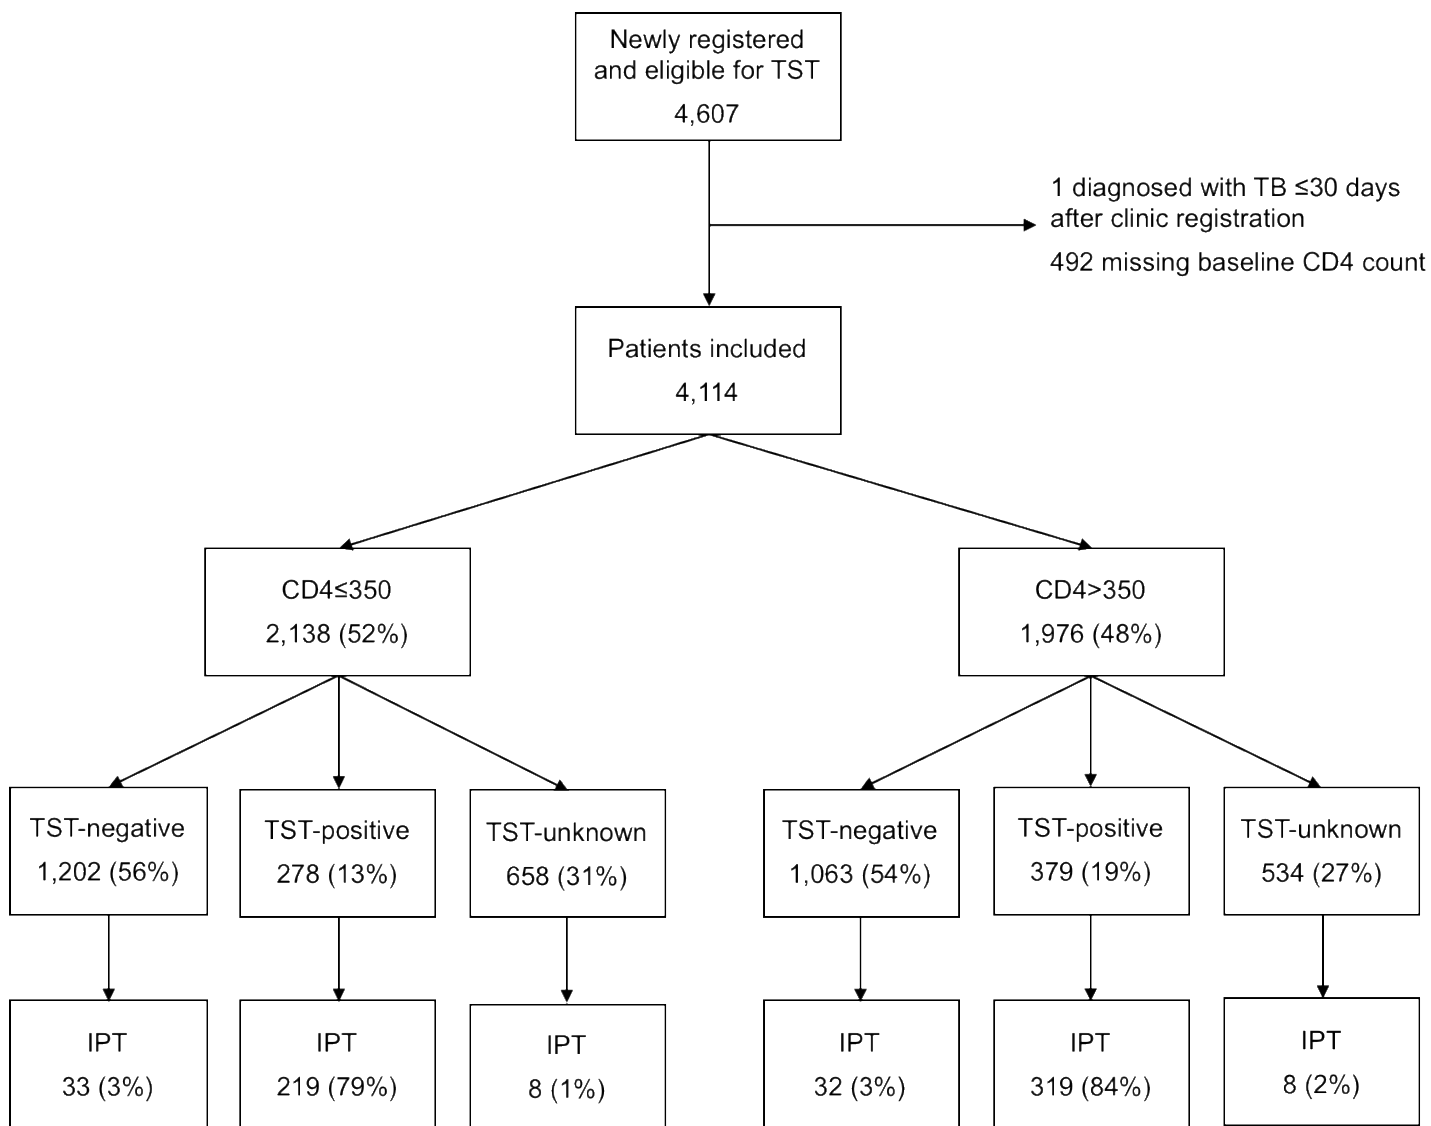

**Abbreviations:** TST, tuberculin skin test; IPT, isoniazid preventive therapy

**Legend:** At the time of the study, national guidelines recommended TST for all HIV patients, and IPT for patients with positive TSTs. In 2018, guidelines were updated to recommend IPT for all patients with CD4 ≤ 350; and TST for patients with CD4 > 350, with IPT for those with positive TSTs.

**Supplementary Figure 2.** Number of participants with a TST placed and read, and percent of participants with a TST placed and read who were a) TST-positive and b) TB cases, by baseline CD4 count

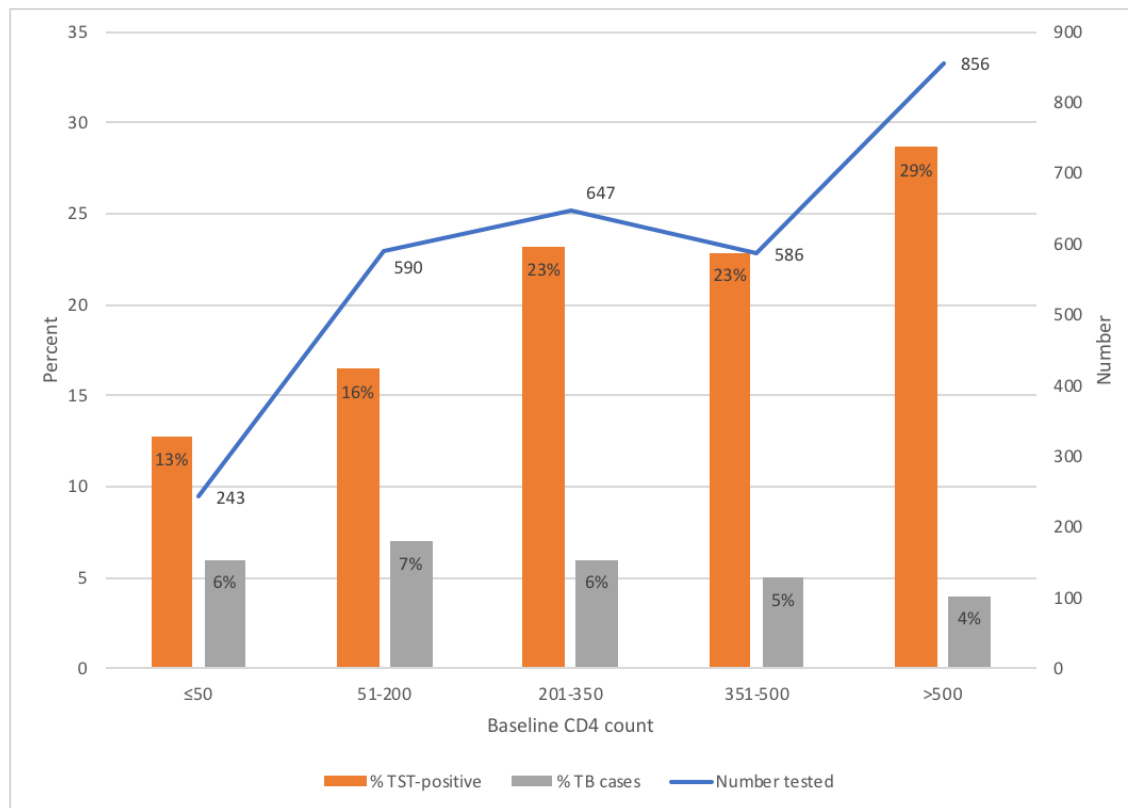

Abbreviations: TST, tuberculin skin test; TB, tuberculosis

**Supplemental Figure 3.** Cumulative hazard of TB by a) baseline CD4 count; b) TST status; c) baseline CD4 count and TST status

a) Baseline CD4 count

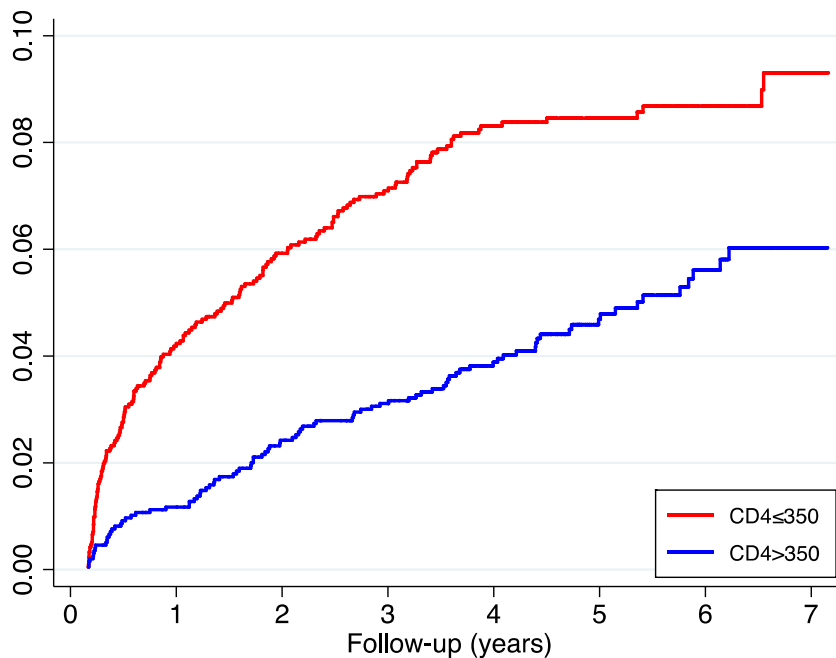

Number at risk

|                |      |      |      |      |      |      |     |    |
|----------------|------|------|------|------|------|------|-----|----|
| CD4 $\leq$ 350 | 2138 | 1998 | 1908 | 1854 | 1487 | 1070 | 623 | 59 |
| CD4 $>$ 350    | 1976 | 1946 | 1899 | 1866 | 1469 | 990  | 574 | 69 |

b) TST status

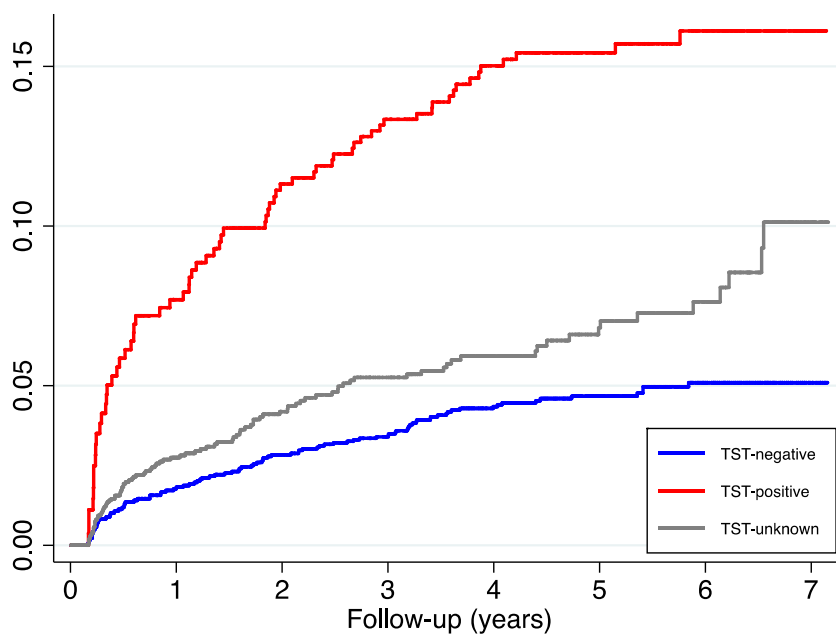

Number at risk

|              |      |      |      |      |      |      |     |    |
|--------------|------|------|------|------|------|------|-----|----|
| TST-negative | 200  | 1982 | 2124 | 2107 | 1720 | 1212 | 714 | 69 |
| TST-positive | 46   | 406  | 509  | 558  | 503  | 374  | 222 | 34 |
| TST-unknown  | 3868 | 1556 | 1174 | 1055 | 733  | 474  | 261 | 25 |

## c) Baseline CD4 count and TST status

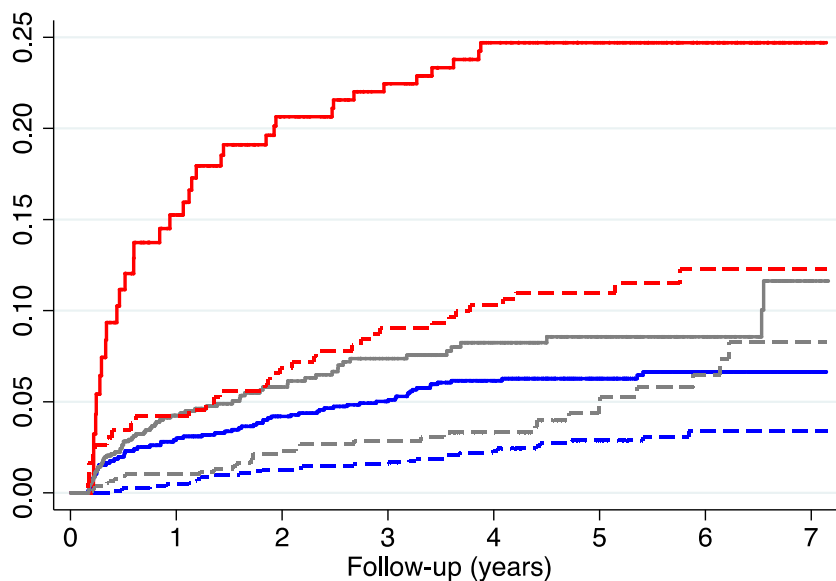

## Number at risk

|                              |      |      |      |      |     |     |     |    |
|------------------------------|------|------|------|------|-----|-----|-----|----|
| CD4 $\leq$ 350, TST-negative | 101  | 1035 | 1107 | 1083 | 895 | 649 | 394 | 34 |
| CD4 $\leq$ 350, TST-positive | 10   | 136  | 198  | 230  | 209 | 170 | 102 | 12 |
| CD4 $\leq$ 350, TST-unknown  | 2027 | 827  | 603  | 541  | 383 | 251 | 127 | 13 |
| CD4 $>$ 350, TST-negative    | 99   | 947  | 1017 | 1024 | 825 | 563 | 320 | 35 |
| CD4 $>$ 350, TST-positive    | 36   | 270  | 311  | 328  | 294 | 204 | 120 | 22 |
| CD4 $>$ 350, TST-unknown     | 1841 | 729  | 571  | 514  | 350 | 223 | 134 | 12 |

— CD4 $\leq$ 350, TST-negative      - - - CD4 $>$ 350, TST-negative  
— CD4 $\leq$ 350, TST-positive      - - - CD4 $>$ 350, TST-positive  
— CD4 $\leq$ 350, TST-unknown      - - - CD4 $>$ 350, TST-unknown

**Abbreviations:** TB, tuberculosis; TST, tuberculin skin test

**Legend:** The 7-year cumulative hazard of TB was: a) 9% for patients with baseline CD4 $\leq$ 350 and 6% for patients with baseline CD4 $>$ 350 (log-rank  $p < 0.001$ ); b) 5% for TST-negatives, 16% for TST-positives, and 10% for TST-unknowns (log-rank  $p < 0.001$ ); and c) 7% for CD4 $\leq$ 350 and TST-negative, 25% for CD4 $\leq$ 350 and TST-positive, 12% for CD4 $\leq$ 350 and TST-unknown, 3% for CD4 $>$ 350 and TST-negative, 12% for CD4 $>$ 350 and TST-positive, and 8% for CD4 $>$ 350 and TST-unknown (log-rank  $p < 0.001$ ).

**Supplemental Figure 4.** Cumulative hazard of TB or death by a) baseline CD4 count; b) TST status; c)

baseline CD4 count and TST status

a) Baseline CD4 count

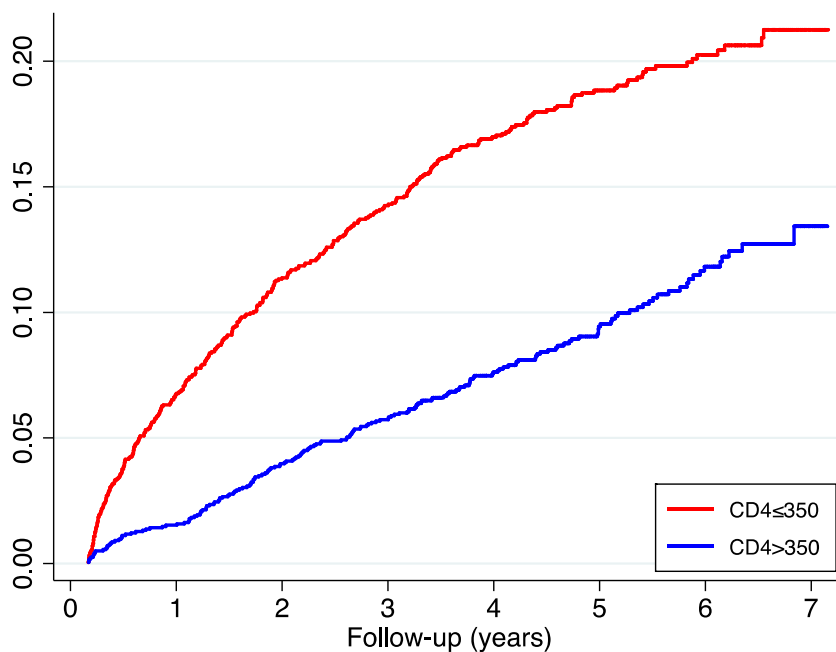

Number at risk

|                |      |      |      |      |      |      |     |    |
|----------------|------|------|------|------|------|------|-----|----|
| CD4 $\leq$ 350 | 2138 | 1998 | 1908 | 1854 | 1487 | 1070 | 623 | 59 |
| CD4 $>$ 350    | 1976 | 1946 | 1899 | 1866 | 1469 | 990  | 574 | 69 |

b) TST status

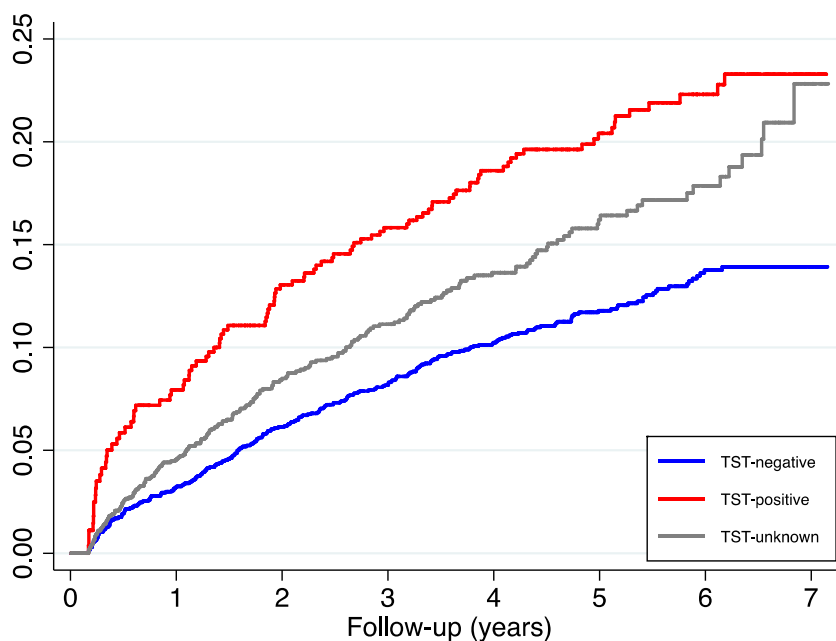

Number at risk

|              |      |      |      |      |      |      |     |    |
|--------------|------|------|------|------|------|------|-----|----|
| TST-negative | 200  | 1982 | 2124 | 2107 | 1720 | 1212 | 714 | 69 |
| TST-positive | 46   | 406  | 509  | 558  | 503  | 374  | 222 | 34 |
| TST-unknown  | 3868 | 1556 | 1174 | 1055 | 733  | 474  | 261 | 25 |

## c) Baseline CD4 count and TST status

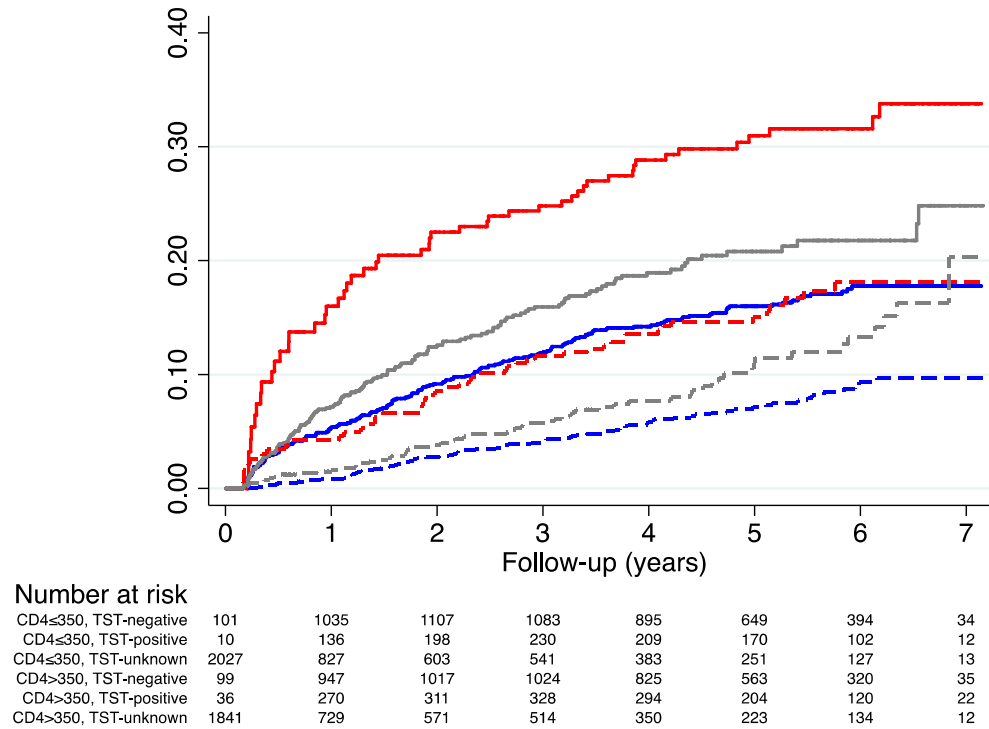

Abbreviations: TB, tuberculosis; TST, tuberculin skin test

Legend: The 7-year cumulative hazard of TB or death was: a) 21% for patients with baseline CD4 $\leq$ 350 and 13% for patients with baseline CD4 $>$ 350 (log-rank  $p < 0.001$ ); b) 14% for TST-negatives, 23% for TST-positives, and 23% for TST-unknowns (log-rank  $p < 0.001$ ); and c) 18% for CD4 $\leq$ 350 and TST-negative, 34% for CD4 $\leq$ 350 and TST-positive, 25% for CD4 $\leq$ 350 and TST-unknown, 10% for CD4 $>$ 350 and TST-negative, 18% for CD4 $>$ 350 and TST-positive, and 15% for CD4 $>$ 350 and TST-unknown (log-rank  $p < 0.001$ ).

### Supplemental Figure 5. Cumulative hazard of TB or death, by IPT and TST status

a) CD4 $\leq$ 350

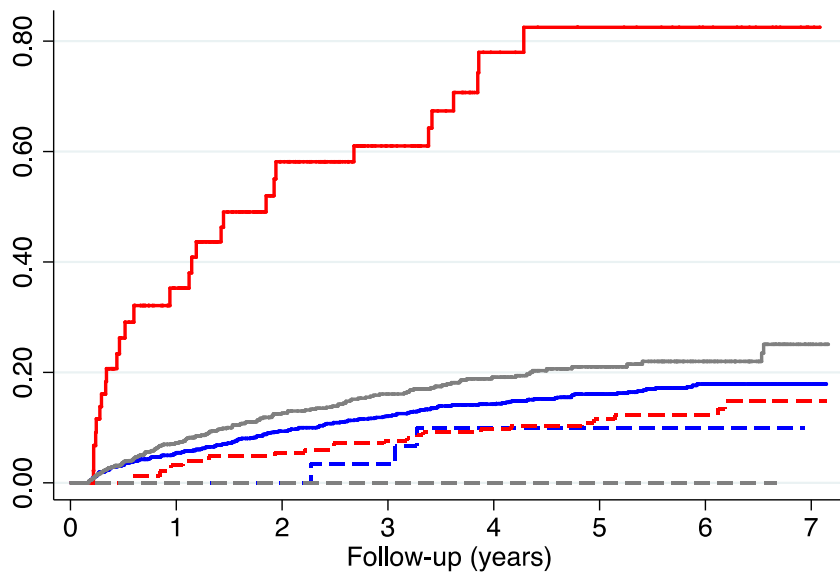

Number at risk

|                      |      |      |      |      |     |     |     |    |
|----------------------|------|------|------|------|-----|-----|-----|----|
| TST-negative, no IPT | 100  | 1012 | 1079 | 1053 | 871 | 631 | 383 | 34 |
| TST-negative, IPT    | 1    | 23   | 28   | 30   | 24  | 18  | 11  | 0  |
| TST-positive, no IPT | 10   | 31   | 33   | 32   | 24  | 20  | 13  | 2  |
| TST-positive, IPT    | 0    | 105  | 165  | 198  | 185 | 150 | 89  | 10 |
| TST-unknown, no IPT  | 2027 | 820  | 595  | 533  | 376 | 247 | 126 | 13 |
| TST-unknown, IPT     | 0    | 7    | 8    | 8    | 7   | 4   | 1   | 0  |

b) CD4>350

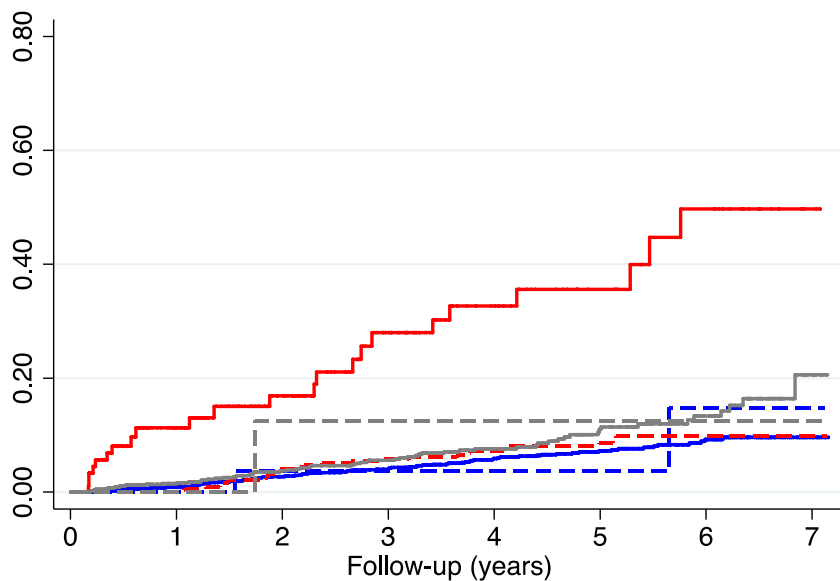

Number at risk

|                      |      |     |     |     |     |     |     |    |
|----------------------|------|-----|-----|-----|-----|-----|-----|----|
| TST-negative, no IPT | 99   | 927 | 990 | 995 | 803 | 546 | 314 | 34 |
| TST-negative, IPT    | 0    | 20  | 27  | 29  | 22  | 17  | 6   | 1  |
| TST-positive, no IPT | 35   | 52  | 50  | 40  | 38  | 25  | 19  | 2  |
| TST-positive, IPT    | 1    | 218 | 261 | 288 | 256 | 179 | 101 | 20 |
| TST-unknown, no IPT  | 1838 | 721 | 564 | 507 | 345 | 219 | 131 | 11 |
| TST-unknown, IPT     | 3    | 8   | 7   | 7   | 5   | 4   | 3   | 1  |

|                        |                       |
|------------------------|-----------------------|
| — TST-negative, no IPT | - - TST-negative, IPT |
| — TST-positive, no IPT | - - TST-positive, IPT |
| — TST-unknown, no IPT  | - - TST-unknown, IPT  |

---

Abbreviations: TB, tuberculosis; IPT, isoniazid preventive therapy; TST, tuberculin skin test

Legend: a) For patients with baseline  $CD4 \leq 350$ , the 7-year cumulative hazard of TB or death was: 18% for TST-negatives who did not receive IPT; 10% for TST-negatives who received IPT; 83% for TST-positives who did not receive IPT; 15% for TST-positives who received IPT; 25% for TST-unknowns who did not receive IPT; and 0% for TST-unknowns who received IPT (log-rank  $p < 0.001$ ). b) For patients with baseline  $CD4 > 350$ , the 7-year cumulative hazard of TB or death was: 10% for TST-negatives who did not receive IPT; 15% for TST-negatives who received IPT; 50% for TST-positives who did not receive IPT; 10% for TST-positives who received IPT; 15% for TST-unknowns who did not receive IPT; and 13% for TST-unknowns who received IPT (log-rank  $p < 0.001$ ).



## Supplemental Tables

**Supplemental Table 1.** Characteristics of patients with missing baseline CD4 counts (N=492)

| <b>Characteristic</b>                                                                                  | <b>N (%)</b>    |
|--------------------------------------------------------------------------------------------------------|-----------------|
| Female sex                                                                                             | 186 (38%)       |
| Median age, years (IQR)                                                                                | 33 (26-42)      |
| Prior ART                                                                                              | 52 (11%)        |
| Median days on ART (IQR)                                                                               | 313 (142-1,749) |
| <b>TST results</b>                                                                                     |                 |
| TST-negative                                                                                           | 54 (11%)        |
| TST-positive*                                                                                          | 13 (3%)         |
| TST-unknown**                                                                                          | 425 (86%)       |
| Median days to TST (IQR)                                                                               | 28 (6-71)       |
| ART at TST                                                                                             | 11 (16%)        |
| <u>Abbreviations:</u> IQR, interquartile range; ART, antiretroviral therapy; TST, tuberculin skin test |                 |
| *No patients converted from TST-negative to -positive over follow-up                                   |                 |
| **TST not placed and/or read                                                                           |                 |

**Supplemental Table 2.** IPT and ART initiation, and outcomes for patients with missing baseline CD4 counts

|                    | <b>Total<br/>(n=492)</b> | <b>TST-negative<br/>(n=54)</b> | <b>TST-positive*<br/>(n=13)</b> | <b>TST-unknown<br/>(n=425)</b> | <b>p-value</b> |
|--------------------|--------------------------|--------------------------------|---------------------------------|--------------------------------|----------------|
| <b>IPT and ART</b> |                          |                                |                                 |                                |                |
| IPT                | 8 (2%)                   | 1 (2%)                         | 6 (46%)                         | 1 (0.2%)                       | <0.001         |
| ART**              | 170 (35%)                | 28 (52%)                       | 6 (46%)                         | 136 (32%)                      | 0.01           |
| IPT and ART**      | 3 (1%)                   | 0 (0%)                         | 3 (23%)                         | 0 (0%)                         | <0.001         |
| <b>Outcomes</b>    |                          |                                |                                 |                                |                |
| TB                 | 38 (8%)                  | 0 (0%)                         | 3 (23%)                         | 35 (8%)                        | 0.01           |
| Died***            | 103 (21%)                | 16 (30%)                       | 3 (23%)                         | 84 (20%)                       | 0.24           |

Abbreviations: TST, tuberculin skin test; IPT, isoniazid preventive therapy; ART, antiretroviral therapy; TB, tuberculosis

\*No patients converted from TST-negative to -positive over follow-up

\*\*52 (11%) patients were on ART at baseline and 1 (0.2%) initiated ART after a TB diagnosis

\*\*\*16 (3%) died after a TB diagnosis

**Supplemental Table 3.** Impact of IPT and ART on incidence of a) TB and b) TB or death, by baseline CD4 count

|                       | <b>CD4≤350</b> |                     |                                          |                               | <b>CD4&gt;350</b> |                     |                                          |                               |
|-----------------------|----------------|---------------------|------------------------------------------|-------------------------------|-------------------|---------------------|------------------------------------------|-------------------------------|
|                       | <b>N=2,138</b> |                     |                                          |                               | <b>N=1,976</b>    |                     |                                          |                               |
|                       | <b>Events</b>  | <b>Person-years</b> | <b>IR per 100 pys</b><br><b>(95% CI)</b> | <b>IRR</b><br><b>(95% CI)</b> | <b>Events</b>     | <b>Person-years</b> | <b>IR per 100 pys</b><br><b>(95% CI)</b> | <b>IRR</b><br><b>(95% CI)</b> |
| <b>a) TB</b>          |                |                     |                                          |                               |                   |                     |                                          |                               |
| No IPT                | 160            | 90                  | 1.79<br>(1.53-2.09)                      | REF                           | 81                | 82                  | 0.99<br>(0.79-1.23)                      | REF                           |
| IPT                   | 10             | 11                  | 0.91<br>(0.49-1.70)                      | 0.54<br>(0.29-1.01)           | 11                | 15                  | 0.71<br>(0.39-1.28)                      | 0.75<br>(0.40-1.40)           |
| No ART                | 32             | 18                  | 1.82<br>(1.28-2.57)                      | REF                           | 64                | 64                  | 1.00<br>(0.78-1.27)                      | REF                           |
| ART                   | 138            | 83                  | 1.67<br>(1.41-1.97)                      | 0.98<br>(0.67-1.45)           | 28                | 33                  | 0.84<br>(0.58-1.22)                      | 0.83<br>(0.53-1.29)           |
| <b>b) TB or death</b> |                |                     |                                          |                               |                   |                     |                                          |                               |
| No IPT                | 348            | 90                  | 3.89<br>(3.50-4.32)                      | REF                           | 160               | 82                  | 1.95<br>(1.67-2.27)                      | REF                           |
| IPT                   | 23             | 11                  | 2.10<br>(1.40-3.16)                      | 0.55<br>(0.36-0.83)           | 27                | 15                  | 1.74<br>(1.20-2.54)                      | 0.91<br>(0.61-1.36)           |
| No ART                | 55             | 18                  | 3.12<br>(2.40-4.07)                      | REF                           | 118               | 64                  | 1.84<br>(1.53-2.20)                      | REF                           |
| ART                   | 316            | 83                  | 3.81                                     | 1.23                          | 69                | 33                  | 2.07                                     | 1.04                          |

---

(3.42-4.26)

(0.93-1.64)

(1.63-2.62)

(0.77-1.39)

---

Abbreviations: IPT, isoniazid preventive therapy; ART, antiretroviral therapy; TB, tuberculosis; IR, incidence rate; CI, confidence interval; IRR, incidence rate ratio

Legend: IPT and ART time-dependent; IRRs adjusted for sex and age at enrollment

---
